# Supplementary material
Source: ML conference proceedings conference paper supplement (https://www.ecva.net/papers/eccv_2022/papers_ECCV/html/136660197_ECCV_2022_paper.php)
Supplement: Supplementary file 1 [file 136660197-supp.zip]

# Grasp'D: Differentiable Contact-rich Grasp Synthesis for Multi-fingered Hands Supplementary Material

Dylan Turpin<sup>1,2,3</sup>, Liquan Wang<sup>1,2</sup>, Eric Heiden<sup>3</sup>, Yun-Chun Chen<sup>1,2</sup>, Miles Macklin<sup>3</sup>, Stavros Tsogkas<sup>4</sup>, Sven Dickinson<sup>1,2,4</sup>, and Animesh Garg<sup>1,2,3</sup>

<sup>1</sup> University of Toronto, <sup>2</sup> Vector Institute, <sup>3</sup> Nvidia, <sup>4</sup> Samsung  
dylanturpin@cs.toronto.edu

## Overview

In this supplementary material, we provide additional details and results to complement the main paper. Specifically:

- We describe the details of our implementation and experimental setting. (Appendix A).
- We provide additional results of our method applied to the YCB dataset [2] with both a human MANO hand model [14] and a robotic Allegro hand model. (Appendix B).
- We provide visualizations of optimization trajectories for MANO hand grasps of YCB and ShapeNet objects, which show how grasps improve as optimization progresses. (Appendix C)
- We provide additional results for the validation of grasp synthesis with RGB-D reconstruction presented (Section 4.3 of the main paper). (Appendix D).

## A Details of implementation and experiments

### A.1 Dataset listings

- Table 1 - ShapeNet object listing (for main experiment in section 4.2).
- Table 2 - YCB object listing (for rgb-d experiment in section 4.3).
- Table 3 - YCB object listing (for ablation experiment in section 4.4).

### A.2 Initialization and smoothing schedule

**Initialization.** Since our grasp synthesis pipeline relies on gradient-based optimization, the final result depends on how the parameters are initialized, i.e., different initial hand poses will recover different final grasps. This is a useful quality in that it allows us to sample a variety of grasps for each object by sampling different starting poses. The force variables  $\hat{\mathbf{f}}_c$  are always initialized to zero. We employ a simple heuristic (adapted from [1]) to initialize the hand pose  $\mathbf{q}_h^{(0)}$ . We set all hand joints to their fully open position. To find an initial rotation and position for the hand base link, we uniformly sample an approach point  $a$  on the object surface and a roll angle  $\theta$  around the approach vector. We use an approach vector opposing the object surface normal at the approach point, and set the hand rotation such that the palm's normal is aligned with

the approach vector. Finally we apply the sampled roll  $\theta$  around the approach vector. We set the hand position so that the palm’s center is at a 10cm distance from the approach point along the approach vector.

**Coarse-to-fine smoothing schedule.** We set the initial value for the coarse-to-fine smoothing radius  $r$  to the distance between the object and the closest point on the hand less 1cm. The radius is then decreased to 0 on a linear schedule over the first 5,000 steps of a 7,000 step optimization and remains at 0 for the final 2,000 steps. The early steps of the optimization find a rough pose for the hand (where on the object to grasp and an approximate finger configuration) and the later steps optimize over fine-grained geometry, allowing the discovery of grasps that conform closely to detailed surface geometry.

### A.3 Mesh processing

We use a discretized SDF representation as described in Section 3.2 of the main paper. Computing the SDF involves some preprocessing. For the experiments in Section 4.2 and 4.4 (on complete ShapeNet and YCB meshes respectively), the input is a mesh from the relevant dataset. For the RGB-D reconstruction experiment in Section 4.3, the input is a reconstructed mesh (see Appendix A.4 for details of the reconstruction pipeline). To compute the sign of the SDF at a given query point, we must determine whether that point is inside or outside the object. This is more straightforward if the mesh consists of a single closed surface, so we first run ManifoldPlus [8] to compute a watertight mesh. Next, a  $(256 \times 256 \times 256)$  grid of points is evenly sampled over the mesh bounding box (padded by 1cm) and the signed distance of each point to the mesh is computed using libigl [9].

### A.4 Reconstruction pipeline

We describe the RGB-D reconstruction pipeline used in Section 4.3. The YCB object dataset includes RGB-D captures for each object. The object is placed on a spinning platter surrounded by 5 cameras and is captured at each of 120 different angles as the plate is rotated in 3 degree increments. We take 15 of these depth images (captures from the first, third and fifth camera at 5 angles in 72 degree increments). We run the code provided alongside the YCB dataset in order to register the depth maps and combine them into a single world frame point cloud. We create a Poisson reconstruction [11] of this point cloud using the Open3D library [17] with a depth of 5. The resulting mesh is still incomplete because the bottom of the object is not visible (since it is the contact surface between the table and the object) We use PyMeshFix [15] to complete this and any other remaining holes in the mesh.

### A.5 Simulation details

We run each simulation for a single timestep of length  $1 \times 10^{-5}$  seconds. For the MANO hand model, all 773 vertices are used as contact locations. For the Allegro hand model, we sample  $\sim 3000$  points on the surface to use as contact locations. In all experiments we set the normal stiffness to  $k_n = 1 \times 10^6$ , frictional stiffness to  $k_f = 1 \times 10^8$ , and the friction coefficient to  $\mu = 0.8$ . For the leaky gradient (described in Section 3.3 of the main paper) we set the proportion of

gradient that leaks through non-colliding contact forces to  $\alpha = 0.1$ . Note that the above applies to simulation during grasp optimization. When we compute simulation displacement for evaluation purposes, we do not use our own simulator, but instead use PyBullet [5] (details in Appendix A.6).

## A.6 Evaluation details

We evaluate grasps in terms of their contact patterns and stability.

**Interpenetration volume** is the volume of the intersection between the hand and the object. Lower values are better (since in reality the hand cannot penetrate the hard object). We compute this by voxelizing the hand (with 1mm resolution) and querying the object’s SDF at each voxel position to decide if each hand voxel is overlapping the object or not.

**Contact area** is the area of surface contact (in  $cm^2$ ) between the hand and the object. This is computed similarly to interpenetration volume, except that only the hand surface is voxelized (i.e., the hand is treated as an empty shell, not a solid volume).

**Contact area to interpenetration volume ratio.** Interpenetration can be avoided by simply avoiding contact with the object entirely, so there is a trade off between interpenetration volume and the other metrics. To capture the amount of interpenetration, conditional on the amount of contact, we report the ratio of contact area to interpenetration.

**$\epsilon$  (Ferrari-Canny) metric** measures grasp stability using the magnitude of the smallest force that can break a grasp. A more stable grasp can withstand larger forces, so a larger force will be needed to break the grasp. This quantity is equivalent to the size of the largest origin-centered ball contained in the Grasp Wrench Space (GWS [6]). The GWS is the space of wrenches the contacts induced by the grasp can withstand, assuming that the total hand-object wrench will be a linear combination of the wrenches at each contact with coefficients summing to 1. Under a Coulomb friction model, the possible wrenches at each contact are defined by a friction cone, which we approximate by a pyramid.

**Volume metric** is an alternate measure of stability that considers all the possible forces a grasp can withstand (instead of just the magnitude of the smallest force that breaks the grasp). The volume metric is simply the volume of the GWS.

**Simulation displacement** is a simulation-based, rather than analytic, measure of stability. We use GANHand’s implementation [4] of a simulation displacement metric in PyBullet [5] to measure grasp stability by checking how far the object is displaced from its initial pose when the grasp is applied. We use the default physics parameters provided by GANHand except for setting the friction coefficient to 1.2 (instead of the seemingly high default of 3.0). Whereas we train (i.e., optimize) our grasps in our own custom simulator, this metric is computed in a widely used third-party simulator (PyBullet), with a different collision detector, contact model and time stepping scheme. This avoids giving ourselves an unfair advantage by training (optimizing) and testing (computing evaluation metrics) with the same contact model and physics engine (which baselines we compare to did not have access to).

**True signed distances.** Whenever a metric relies on the object SDF (e.g., to compute contact forces or to determine if a voxel is intersecting the object or not), we compute that SDF with libigl [9] using the ground truth mesh instead of a discrete grid approximation of the SDF.

**Evaluating on top  $k$  grasps.** For our method, we report metrics for the top 2 and top 5 grasps (ordered by simulation displacement -- details below) for each object. For the ObMan dataset, we report the top 2 and top 5 grasps for each object (ordered by their heuristic measure, described below). The ObMan generation procedure uses the GraspIt! simulator to synthesize grasps by optimizing (with simulated annealing) over an analytic metric. Many grasps for each object are generated by running about 70k steps annealing steps. The top 2 grasps are then selected according to a heuristic measure (see Appendix C.2 of [7]) which encourages palm and phalange contact. This heuristic was explicitly added to compensate for the bias of analytic synthesis towards fingertip-only grasps. To test our own method, we generate 10 grasps for each object, each using 7000 optimization steps. We report these metrics over the top 2 and top 5 grasps with the lowest simulation displacement.

#### A.7 Optimization details

We used the ADAMax [16] optimizer to update the the hand pose parameters  $\mathbf{q}_h^{(0)}$  (with a learning rate of  $3 \times 10^{-3}$ ) and force parameters  $\hat{\mathbf{f}}_c$  (with a learning rate of  $1 \times 10^{-2}$ ). Some objectives are more important than others, so are treated as constraints to satisfy rather than costs to minimize. Specifically, we use the Modified Differential Multiplier Method [13], treating  $\mathcal{L}_{\text{task}} < C_{\text{task}}$  and  $\mathcal{L}_{\text{limit}} < C_{\text{limit}}$  as constraints, while minimizing  $\mathcal{L}_{\text{phys}}$ ,  $\mathcal{L}_{\text{range}}$  and  $\mathcal{L}_{\text{inter}}$ . We set  $C_{\text{task}} = 1 \times 10^{-4}$  and  $C_{\text{limit}} = 1 \times 10^{-4}$ . Damping is set to 1.0 for all constraints. During MANO hand experiments, we do not use the joint limit loss  $\mathcal{L}_{\text{limit}}$  or joint limit constraint, as these limits appear to be well-handled implicitly by the PCA parameterization. Similarly, we do not compute the self-intersection loss for the MANO hand, yet recover grasps with low self-intersection due to the hand parameterization. All losses are used enabled for the Allegro hand.

#### A.8 Timing

On a mobile Nvidia RTX 2070, generating a MANO hand grasp for a YCB object (by taking 7,000 optimizer steps) takes about 5 minutes. The MANO hand has only 773 vertices, so the memory footprint of the simulation is limited and three grasps can be synthesized in parallel, reducing average grasp synthesis time to about 2 minutes. While not yet approaching realtime performance, this is comparable to the speed of analytic synthesis with the GraspIt! simulator [12], which takes around 5 minutes [4] to synthesize a grasp when using the eigengrasp planner with simulated annealing as for the ObMan dataset [7].

## B YCB results

We provide additional examples of applying our method to objects from the YCB dataset with both the Allegro robotic hand and the MANO human hand models (see Figures 1 and 2 respectively).

## C Optimization trajectories

To visualize how grasps evolve as optimization progresses, we render hand poses at regular intervals throughout optimization trajectories for 10 grasps (5 for objects from YCB, 5 for objects from ShapeNet -- see Figure 3 and Figure 4 respectively).

## D Additional RGB-D results

We provide additional qualitative results of applying our methods to objects reconstructed from RGBD images in the YCB dataset. Figure 5 shows 3 synthesized grasps for each object visualized from 2 different viewpoints. We also provide quantitative results for our RGB-D experiment (section 4.3 of the main paper) in Table 4.

| Input   | CA $\uparrow$ | IV $\downarrow$ | $\frac{CA}{IV}\uparrow$ | SD $\downarrow$ |
|---------|---------------|-----------------|-------------------------|-----------------|
| GT-Mesh | <b>42.6</b>   | <b>2.83</b>     | <b>15.1</b>             | <b>0.41</b>     |
| RGB-D   | 25.46         | 7.82            | 3.26                    | 5.68            |

**Table 4: RGB-D experiment quantitative results.** Performance with reconstructions is poorer than with ground truth object models, but the resulting grasps are still visually plausible (see Figure 4 of the main paper, Figure 5 of the supplemental) and metrics are comparable to Grasping Field [10] and GANHand [4]. Small errors in reconstruction may produce large errors in grasp synthesis, a drawback future work might address by optimizing over the reconstruction alongside the grasp.

## E Training on synthesized data

Fine-tuning Grasping Field [10] with data generated by Grasp'D improves performance on unseen YCB objects better than additional GraspIt! [12] data. Table 5 displays the result of fine-tuning a pre-trained Grasping Field network with additional data synthesized by either the GraspIt! simulator or Grasp'D. The network is first trained for 1400 epochs on the ObMan dataset [7] (of synthetic GraspIt! grasps) and then fine-tuned for 100 epochs on 1000 new grasps (of ShapeNet [3] objects already included in the ObMan dataset) before final testing on 8 objects from the YCB set. Fine-tuning with Grasp'D data results in significantly higher-contact grasps. This comes with a slight increase in intersection volume, but the ratio of contact area to intersection is improved, as is the simulation displacement.

| Data source   | CA $\uparrow$ | IV $\downarrow$ | $\frac{CA}{IV}$ $\uparrow$ | SD $\downarrow$ |
|---------------|---------------|-----------------|----------------------------|-----------------|
| GraspIt! [58] | 15.78         | <b>9.44</b>     | 1.67                       | 3.30            |
| Grasp'D       | <b>21.00</b>  | 11.23           | <b>1.78</b>                | <b>2.88</b>     |

**Table 5: Fine-tuning Grasping Field [10] with data generated by Grasp'D improves performance on unseen YCB objects better than additional GraspIt! [12] data.**

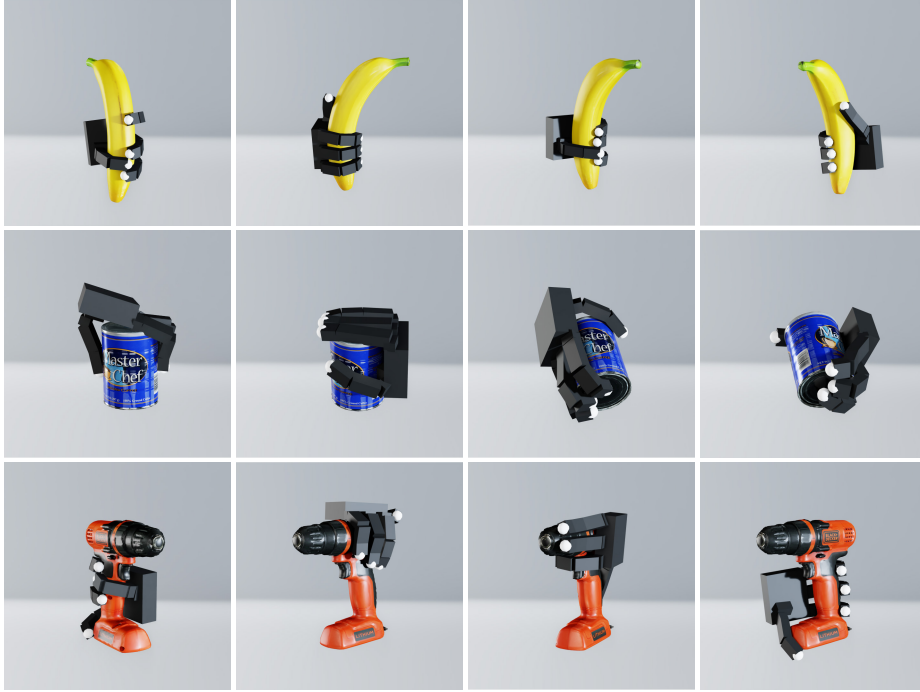

**Fig. 1: Robotic grasping with the four-fingered Allegro hand.** Our method works equally well with robotic and human hand models. We visualise grasps of three YCB objects [2] with the four-fingered Allegro robotic hand. We can recover a variety of grasps for each object by sampling different initial hand poses (which gradient-based optimization takes to different final grasps). See Appendix A.2 for details of initialization.

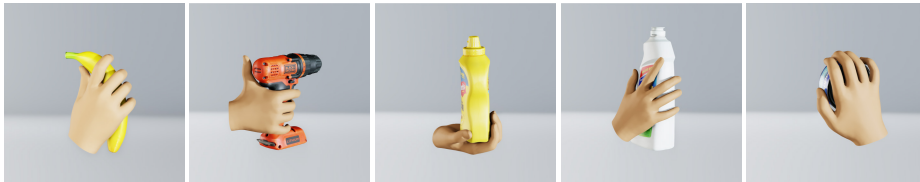

**Fig. 2: Synthesized MANO hand grasps of YCB objects.** Our method generates contact-rich grasps for objects from the YCB dataset. These qualitative results are drawn from the ablation study in Section 4.4 of the main paper, specifically with all features turned on, corresponding to the row labelled Grasp'D in Table 3.

| Category | ID                               | Shape ID |
|----------|----------------------------------|----------|
| 2876657  | 1071fa4cddb2da2fc8724d5673a063a6 |          |
| 2876657  | 109d55a137c042f5760315ac3bf2c13e |          |
| 2876657  | 10dff3c43200a7a7119862dbccbaa609 |          |
| 2876657  | 10f709cecfbb8d59c2536abb1e8e5eab |          |
| 2876657  | 114509277e76e413c8724d5673a063a6 |          |
| 2876657  | 1349b2169a97a0ff54e1b6f41fdd78a  |          |
| 2876657  | 134c723696216adddede8d59893c8633 |          |
| 2880940  | 12ddb18397a816c8948bef6886fb4ac  |          |
| 2880940  | 13e879cb517784a63a4b07a265cff347 |          |
| 2880940  | 154ab09c67b9d04fb4971a63df4b1d36 |          |
| 2880940  | 18529eba21e4be8b5cc4957a8e7226be |          |
| 2880940  | 188281000addc9977981b941eb4f5d1  |          |
| 2880940  | 1a0a2715462499fbf9029695a3277412 |          |
| 2880940  | 1b4d7803a3298f8477bdc8816a3fac9  |          |
| 2942699  | 1298634053ad50d36d07c55cf995503e |          |
| 2942699  | 147183af1ba4e97b8a94168388287ad5 |          |
| 2942699  | 15e72ce7a8a328d1fd9cfa6c7f5305bc |          |
| 2942699  | 17a010f0ade4d1fd83a3e53900c6cbba |          |
| 2942699  | 1967344f80da29618d342172201b8d8c |          |
| 2942699  | 1ab3abb5c090d9b68e940c4e64a94e1e |          |
| 2942699  | 1cc93f96ad5e16a85d3f270c1c35flc7 |          |
| 2946921  | 100c5aee62flc9b9f54f8416555967   |          |
| 2946921  | 10c9a321485711a88051229d056d81db |          |
| 2946921  | 11c785813efc4b8630eaa40a8a562c1  |          |
| 2946921  | 129880fda38f3f2ba1ab68e159bfb347 |          |
| 2946921  | 147901ede668deb7d8d848cc867b0bc8 |          |
| 2946921  | 17ef524ca4e382dd9d2ad28276314523 |          |
| 2946921  | 19fa6044dd31aa8e9487fa707cec1558 |          |
| 2992529  | 1101db09207b39c244f01fc4278d10c1 |          |
| 2992529  | 1105c21040f11b4aec5c418afd946fad |          |
| 2992529  | 112cdf6f3466e35fa36266c295c27a25 |          |
| 2992529  | 113303df7880cd71226bc3b9ce9ff2a1 |          |
| 2992529  | 11e925c3ea180b583388c2584b2f0f90 |          |
| 2992529  | 11f7613cae7d973fd7e59c29eb25f02f |          |
| 2992529  | 128bb46234d7250721844676433a0aca |          |
| 3593526  | 10af6bdf126209faaf0ad030fc37d94  |          |
| 3593526  | 1168c9e9db2c1c5066639e628d6519b6 |          |
| 3593526  | 117843347cde5b502b18a5129db1b7d0 |          |
| 3593526  | 1252b0fc818969ebca2ed12df13a916a |          |
| 3593526  | 12d643221a3edaa4ab361b6be63163da |          |
| 3593526  | 12ec19e85b31e274725f67267e31c89  |          |
| 3593526  | 133dc38c1316d9515dc3653f8341633a |          |
| 3624134  | 102982a2159226c2cc34b900bb2492e  |          |
| 3624134  | 118141f7d22bc46eab7b7328341827a  |          |
| 3624134  | 11c987c9a34457e48c2fa4fb6bd3e62  |          |
| 3624134  | 135f75a374a1e22c46cb8dd27ae7fcd  |          |
| 3624134  | 13bf5728b1f3b6cfadd1691b2083e9e7 |          |
| 3624134  | 13d183a44f143ca8c842482418ab083d |          |
| 3624134  | 1460eded8006b10139c78a1e40e247f3 |          |
| 4074963  | 1941c37c6db30e481ef53acb6e05e27a |          |
| 4074963  | 1aa78ce410bdbcd92530f02db7e9157e |          |
| 4074963  | 2053bdd83749adcc1e5c09d9fe5c0c76 |          |
| 4074963  | 226078581cd4efd755c5278938766a05 |          |
| 4074963  | 240456647fbca47396d8609ec76a915b |          |
| 4074963  | 25182f6e03375c9e7b6fd5468f603b31 |          |
| 4074963  | 259539bd48513e3410d32c800df6e3dd |          |

**Table 1:** For experiment 1 (comparison to Obman) in Section 4.2 of the main paper, we use the following ShapeNet objects.



| Object ID | Object Name     |
|-----------|-----------------|
| 001       | chips_can       |
| 002       | master_chef_can |
| 005       | tomato_soup_can |
| 006       | mustard_bottle  |
| 008       | pudding_box     |
| 010       | potted_meat_can |
| 021       | bleach_cleanser |
| 035       | power_drill     |

**Table 2:** For experiment 2 (RGBD reconstruction) we use the following YCB objects.

| Object ID | Object Name       |
|-----------|-------------------|
| 002       | master_chef_can   |
| 003       | cracker_box       |
| 004       | sugar_box         |
| 005       | tomato_soup_can   |
| 006       | mustard_bottle    |
| 007       | tuna_fish_can     |
| 008       | pudding_box       |
| 009       | gelatin_box       |
| 010       | potted_meat_can   |
| 011       | banana            |
| 019       | pitcher_base      |
| 021       | bleach_cleanser   |
| 024       | bowl              |
| 025       | mug               |
| 035       | power_drill       |
| 036       | wood_block        |
| 037       | scissors          |
| 040       | large_marker      |
| 051       | large_clamp       |
| 052       | extra_large_clamp |
| 061       | foam_brick        |

**Table 3:** For experiment 2 (RGBD reconstruction) we use the following YCB objects.

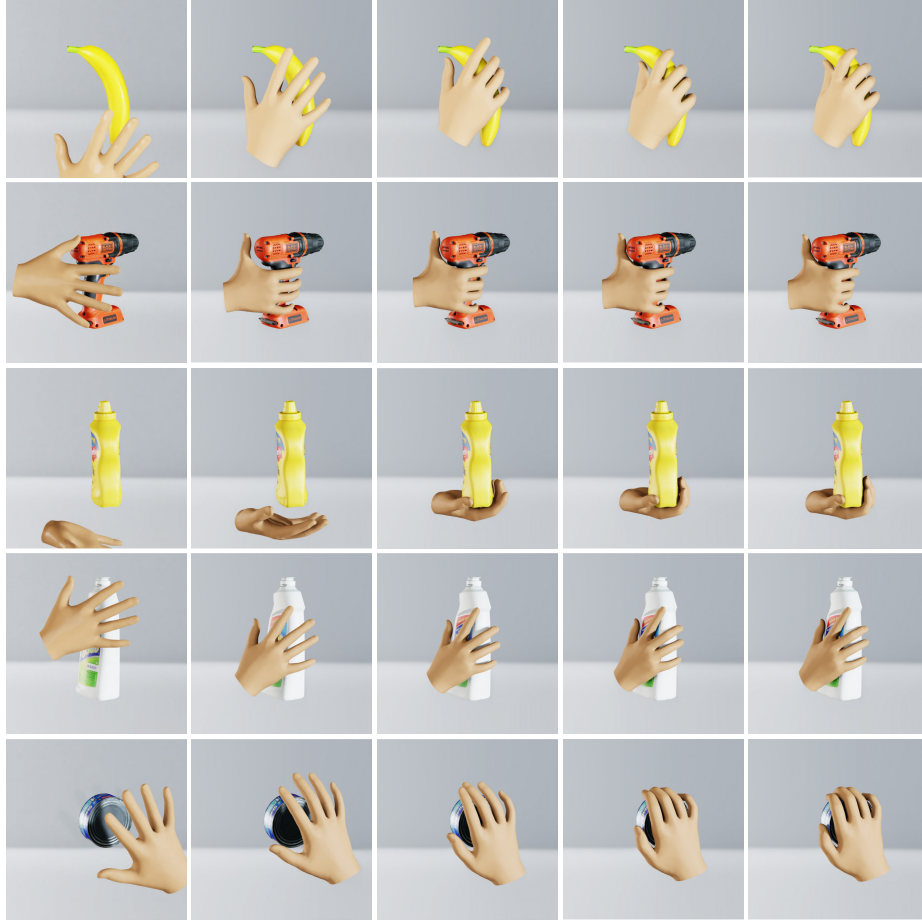

**Fig. 3: Optimization trajectories for MANO hand grasps of YCB objects.** Grasps improve as optimization progresses (from left-to-right in the figure). We visualize the optimization paths that result in the final grasps in Figure 2. The leftmost column shows the initial hand pose (see Appendix A.2 for details of initialization) and the optimization progresses from left to right until reaching the final grasps in the rightmost column. Initially, the hand is not even in contact with the object, but as optimization continues the grasp becomes higher contact, more plausible, and more stable.

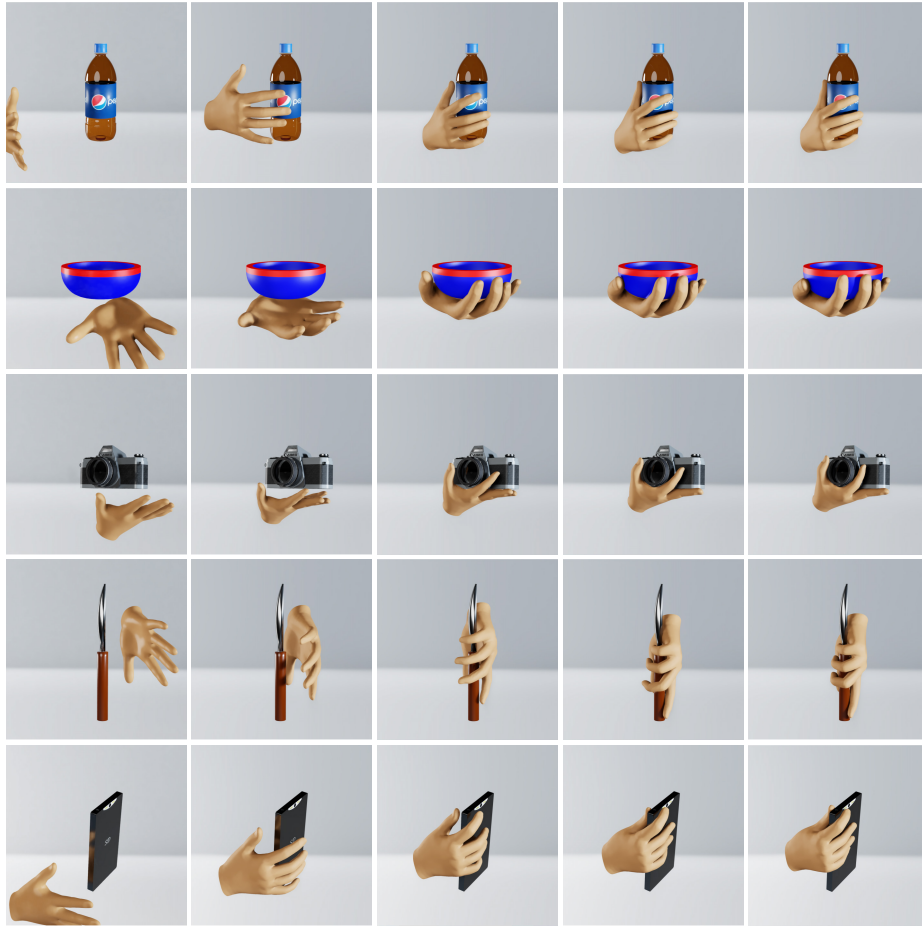

**Fig. 4: Optimization trajectories for MANO hand grasps of ShapeNet objects.** Grasps improve as optimization progresses (from left-to-right in the figure). We visualize the optimization paths that result in the final grasps in the second row of Figure 1 of the main paper.

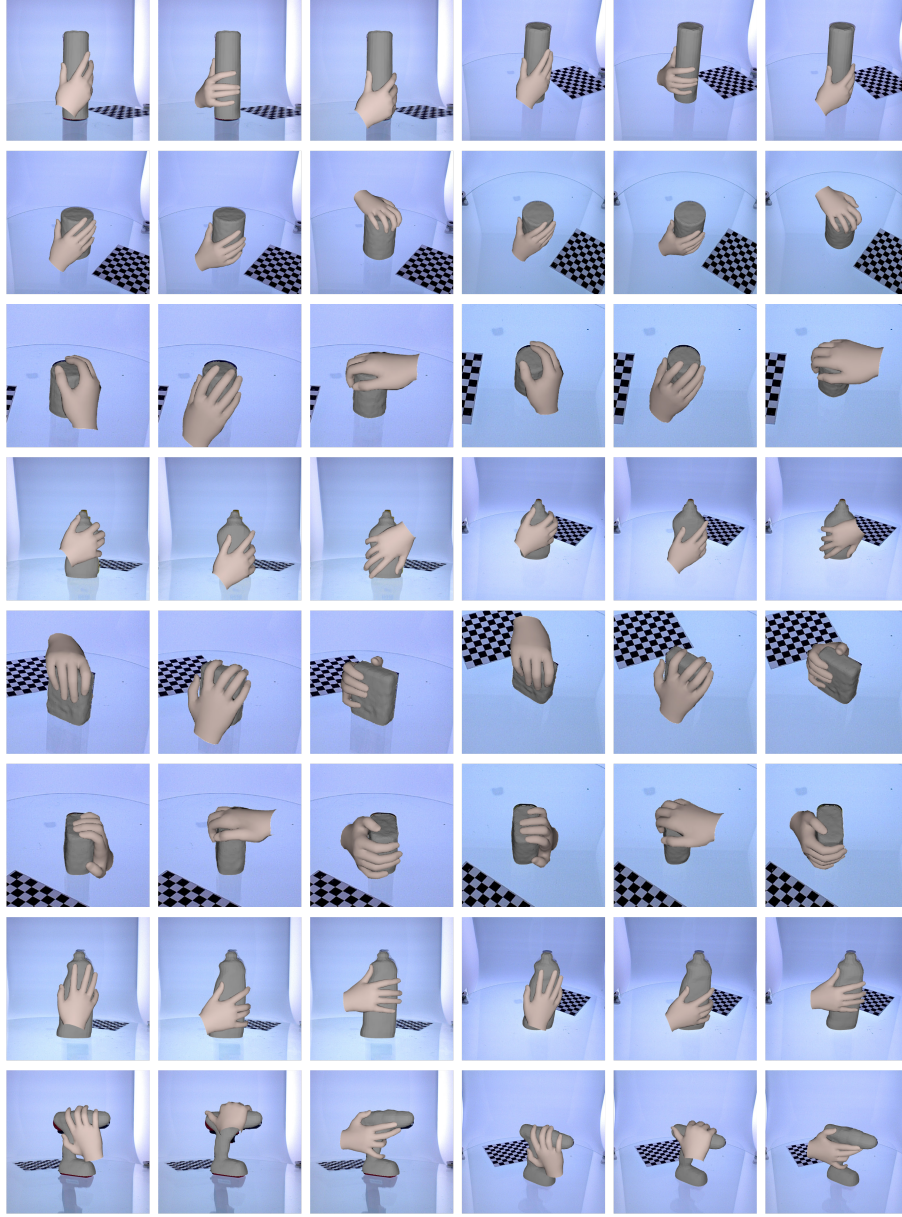

**Fig. 5: Grasp synthesis from RGB-D.** We use RGB-D captures from the YCB dataset [2] to reconstruct object models from which we synthesize grasps (see section 4.3 of the main paper for details). Our method can synthesize plausible grasps not just from ground truth object models, but also from imperfect reconstructions.

## Bibliography

- [1] Brahmbhatt, S., Handa, A., Hays, J., Fox, D.: Contactgrasp: Functional multi-finger grasp synthesis from contact. In: IROS (2019) [1](#)
- [2] Calli, B., Singh, A., Bruce, J., Walsman, A., Konolige, K., Srinivasa, S., Abbeel, P., Dollar, A.M.: Yale-cmu-berkeley dataset for robotic manipulation research. *International Journal of Robotics Research* (2017) [1](#), [7](#), [12](#)
- [3] Chang, A.X., Funkhouser, T., Guibas, L., Hanrahan, P., Huang, Q., Li, Z., Savarese, S., Savva, M., Song, S., Su, H., et al.: Shapenet: An information-rich 3d model repository. *arXiv preprint arXiv:1512.03012* (2015) [5](#)
- [4] Corona, E., Pumarola, A., Alenya, G., Moreno-Noguer, F., Rogez, G.: Gan-hand: Predicting human grasp affordances in multi-object scenes. In: *CVPR* (2020) [3](#), [4](#), [5](#)
- [5] Coumans, E., Bai, Y.: Pybullet, a python module for physics simulation for games, robotics and machine learning. <http://pybullet.org> (2016) [3](#)
- [6] Ferrari, C., Canny, J.F.: Planning optimal grasps. In: *ICRA* (1992) [3](#)
- [7] Hasson, Y., Varol, G., Tzionas, D., Kalevatykh, I., Black, M.J., Laptev, I., Schmid, C.: Learning joint reconstruction of hands and manipulated objects. In: *CVPR* (2019) [4](#), [5](#)
- [8] Huang, J., Zhou, Y., Guibas, L.: Manifoldplus: A robust and scalable watertight manifold surface generation method for triangle soups. *arXiv preprint arXiv:2005.11621* (2020) [2](#)
- [9] Jacobson, A., Panozzo, D., et al.: libigl: A simple C++ geometry processing library (2018) [2](#), [4](#)
- [10] Karunratanakul, K., Yang, J., Zhang, Y., Black, M.J., Muandet, K., Tang, S.: Grasping field: Learning implicit representations for human grasps. In: *3DV* (2020) [5](#), [6](#)
- [11] Kazhdan, M., Bolitho, M., Hoppe, H.: Poisson surface reconstruction. In: *Eurographics symposium on Geometry processing*. vol. 7 (2006) [2](#)
- [12] Miller, A.T., Allen, P.K.: Graspit! a versatile simulator for robotic grasping. *IEEE Robotics & Automation Magazine* (2004) [4](#), [5](#), [6](#)
- [13] Platt, J.C., Barr, A.H.: Constrained differential optimization. In: *NeurIPS* (1987) [4](#)
- [14] Romero, J., Tzionas, D., Black, M.J.: Embodied hands: Modeling and capturing hands and bodies together. *ACM Transactions on Graphics* (2017) [1](#)
- [15] Sullivan, C.B., Kaszynski, A.: PyVista: 3d plotting and mesh analysis through a streamlined interface for the visualization toolkit (VTK). *Journal of Open Source Software* (2019) [2](#)
- [16] Zhang, Z.: Improved adam optimizer for deep neural networks. In: *2018 IEEE/ACM 26th International Symposium on Quality of Service (IWQoS)*. pp. 1–2. *IEEE* (2018) [4](#)
- [17] Zhou, Q.Y., Park, J., Koltun, V.: Open3D: A modern library for 3D data processing. *arXiv:1801.09847* (2018) [2](#)
